# Supplementary material
Source: PubMed Central journal article supplement (PMC6686193)
Supplement: NIHMS1035774-supplement-supplemental.pdf [file NIHMS1035774-supplement-supplemental.pdf]

## Role of Kynurenine pathway and its metabolites in Mood Disorders – A Systematic Review and Meta-analysis of Clinical Studies

### Supplementary Fmle: Study Quality Summary:

| Study ID                   | First author, year   | Study Execution Quality | Study quality assessment criteria and Explanation for study quality assessment                                                                                                    |
|----------------------------|----------------------|-------------------------|-----------------------------------------------------------------------------------------------------------------------------------------------------------------------------------|
| <b>Unipolar Depression</b> |                      |                         |                                                                                                                                                                                   |
| 1.                         | Wood et al, 1978     | 3-Fair                  | 1A) Study sample time frame not described<br>2C) Sampling strategy not described<br>5B) Did not control for potential confounding factors such as age, BMI, physical illness, etc |
| 2.                         | Sublette et al, 2011 | 2-Fair                  | 1A) Study sample time frame not described<br>2C) Sampling strategy not described                                                                                                  |
| 3.                         | Quak et al, 2014     | 0-Good                  | None                                                                                                                                                                              |
| 4.                         | Bradley et al, 2015  | 3-Fair                  | 1A) Study sample time frame not described<br>2C) Sampling strategy not described<br>5B) Did not control for potential confounding factor, BMI                                     |
| 5.                         | Dahl et al, 2015     | 0- Good                 | None                                                                                                                                                                              |
| 6.                         | Meier et al, 2015    | 0-Good                  | None                                                                                                                                                                              |
| 7.                         | Krause et al, 2017   | 2-Fair                  | 1A) Study sample time frame not described<br>2C) Sampling strategy not described                                                                                                  |
| 8.                         | Baranyi et al, 2017  | 0-Good                  | None                                                                                                                                                                              |
| 9.                         | Umehara et al, 2017  | 2-Fair                  | 1A) Study sample time frame not described<br>2C) Sampling strategy not described                                                                                                  |
| <b>Bipolar Disorder</b>    |                      |                         |                                                                                                                                                                                   |
| 1.                         | Myint et al, 2007    | 3-Fair                  | 1A) Study sample time frame not described<br>2C) Sampling strategy not described<br>5B) Other confounding factors like Smoking, Alcohol, comorbidities not taken into account     |

## Role of Kynurenine pathway and its metabolites in Mood Disorders – A Systematic Review and Meta-analysis of Clinical Studies

| Study ID | First author, year      | Study Execution Quality | Study quality assessment criteria and Explanation for study quality assessment                                                                                                     |
|----------|-------------------------|-------------------------|------------------------------------------------------------------------------------------------------------------------------------------------------------------------------------|
| 2.       | Reininghaus et al, 2014 | 3-Fair                  | 1A) Study population time frame not mentioned.<br>2C) Sampling strategy not described<br>5B) Other confounding factors like Smoking, Alcohol, comorbidities not taken into account |
| 3.       | Savitz et al, 2015a     | 2-Fair                  | 1A) Study sample time frame not described<br>2C) Sampling strategy not described                                                                                                   |
| 4.       | Poletti et al, 2016     | 0-Good                  | None                                                                                                                                                                               |
| 5.       | Platzer et al, 2017     | 0-Good                  | None                                                                                                                                                                               |

### Scoring Rules:

|                           |                        |
|---------------------------|------------------------|
| Good execution quality    | 0-1 limitations.       |
| Fair execution quality    | 2-4 limitations.       |
| Limited execution quality | 5 or more limitations. |

### Sources:

Zaza S, Wright-De Agüero LK, Briss PA, Truman BI, Hopkins DP, Hennessy MH, et al. Data collection instrument and procedure for systematic reviews in the Guide to Community Preventive Services. Task Force on Community Preventive Services. American journal of preventive medicine. 2000 Jan;18 (1 Suppl):44-74.

Scoring rules come from [www.thecommunityguide.com](http://www.thecommunityguide.com) and Briss PA, Zaza S, Pappaioanou M, et al. Developing an evidence-based Guide to Community Preventive Services--methods. The Task Force on Community Preventive Services. *Am J Prev Med.* Jan 2000;18(1 Suppl):35-43.
